# 1 Knowledge and attitude of Iranian university students toward genital warts

2 **Running title:** Knowledge and attitude of students toward HPV

3 Zeinab Aryanian<sup>1,2</sup>, Maedeh Mohammadi<sup>2</sup>, Arefeh Babazadeh<sup>3</sup>, Ifa Etesami<sup>1,4</sup>, Parvaneh Hatami<sup>1,3</sup>,  
4 Mohammad Barary<sup>5</sup>, Soheil Ebrahimpour<sup>3</sup>, Parisa Sabbagh<sup>3</sup>, Azadeh Goodarzi<sup>6,\*</sup>

5 1- Autoimmune Bullous Diseases Research Center, Tehran University of Medical Sciences, Tehran,  
6 Iran

7 2- Department of Dermatology, School of Medicine, Babol University of Medical Sciences, Babol,  
8 Iran

9 3- Infectious Diseases and Tropical Medicine Research Center, Health Research Institute, Babol  
10 University of Medical Sciences, Babol, Iran

11 4- Department of Dermatology, Tehran University of Medical Sciences, Tehran, Iran

12 5- Student Research Committee, Babol University of Medical Sciences, Babol, Iran

13 6- Department of Dermatology, School of Medicine, Iran University of Medical Sciences, Tehran,  
14 Iran

15 **Correspondence:** Azadeh Goodarzi, Rasoul Akram Hospital, Iran University of Medical Sciences  
16 (IUMS), Niayesh Blvd., Sattarkhan St., Tehran, Iran. Email: [goodarzi.a@iums.ac.ir](mailto:goodarzi.a@iums.ac.ir);  
17 [drsoheil.d@gmail.com](mailto:drsoheil.d@gmail.com). Tel: +98912-388-2448

18

## 19 Funding statement

20 This study was fully supported by the vice-chancellor for research and technology of Babol  
21 University of Medical Sciences.

## 22 Acknowledgments

23 The authors thank the Department of Infectious Diseases of Babol University of Medical Sciences.

## 24 Data Availability Statement

25 The data that support the findings of this study are available from the corresponding author upon  
26 reasonable request.

## 27 Conflict of interest disclosure

28 All authors declare no conflict of interest.

## 29 Ethics approval statement

30 This study protocol was approved by the ethics committee of Babol University of Medical Sciences  
31 (MUBABOL.HRI.REC.1396.19).

32

## 33 Abstract

34 Human papillomavirus (HPV) is one of the well-known causes of cervical cancer and one of the  
 35 most prevalent sexually transmitted diseases (STDs). Since cervical cancer is one of the most  
 36 common causes of morbidity and mortality in women, this study was performed to investigate  
 37 students' knowledge and attitudes in Babol University of Medical Sciences, Northern Iran, towards  
 38 genital warts. This cross-sectional study assessed the perception and attitudes of 385 students at  
 39 Babol University of Medical Sciences using a preconceived questionnaire. The data collection tool  
 40 used in this study was a questionnaire that was confirmed to be valid and reliable. The participants'  
 41 mean age was  $23.70 \pm 3.27$  years, with a range of 20-50 years. Evaluation of these students' level of  
 42 general information about HPV showed that 7 (1.8%) students had inadequate general information,  
 43 34 (8.8%) had moderate knowledge, and 344 (89.4%) had good general knowledge in this setting.  
 44 There was also a significant association between students' general knowledge of HPV and their  
 45 field of study. Based on the present study results, the knowledge of the majority of Babol  
 46 University of Medical Sciences students about genital warts was in a good range, and their  
 47 knowledge about HPV routes of transmission was of moderate level. Moreover, the majority had an  
 48 appropriate attitude to interact with people infected with HPV.

49

50 **Keywords:** Human papillomavirus; Cervical cancer; Knowledge; Attitude; Students

51

52

53

54

55

56

57

58

59

60

61

62

## 63 Introduction

64 Human papillomavirus (HPV) is the standard warts agent, manifested by multiple skin-colored  
 65 papules in different parts of the body, including the anus, vulva, penis, and pubis. It may occur in all  
 66 human populations and can sometimes lead to cancer. Its infectivity mechanism involves the  
 67 cutaneous and mucosal epithelial tissues from different anatomical regions.<sup>1</sup> To date, more than a  
 68 hundred different types of HPV have been identified, one-third of which infect the epithelial cells of  
 69 the reproductive system.<sup>2</sup> Human genital papillomavirus types are divided into two categories: low-  
 70 risk types, such as HPV types 6, and 11, which are the causes of benign warts, do not progress to  
 71 cancer, and usually improve spontaneously. On the other hand, high-risk types, including HPV  
 72 types 16, 18, 31, 33, and 45, associated with the development of genital cancer, have been engaged  
 73 in 99% of cervical cancers, among which HPV 16 is the most common type involved.<sup>3-5</sup>

74 The increasing prevalence of HPV as the most common sexually transmitted disease (STD) in  
 75 young people has caused considerable interest in human health.<sup>6</sup> HPV can be transmitted through  
 76 sexual intercourse. Studies have shown that 30-60% of sexually active adults become infected with  
 77 HPV at least once during their reproductive age, and this rate is higher in younger women than the  
 78 older ones.<sup>7-9</sup> Nearly 80% of HPV infections disappear within 3 to 4 years without intervention.  
 79 However, primary prevention using vaccination and screening for cervical cancer appears to be  
 80 beneficial.<sup>8</sup> The HPV vaccine is safe and reduces cervical cancer progression in 70% of cases, and  
 81 to have the utmost efficacy, it should be given before first sexual intercourse.

82 Nevertheless, recommending the vaccine to a single adult girl has posed challenges.<sup>8,9</sup> On the other  
 83 hand, the anxiety of being infected and being diagnosed with HPV infection through Papanicolaou  
 84 (Pap) smear screening test seems to be due to a lack of knowledge about HPV infection.<sup>10</sup>  
 85 Therefore, being aware of the relationship between HPV and cervical cancer is the most critical  
 86 issue for the general population. Surprisingly, even health care personnel appear to have little  
 87 information about this entity.<sup>8</sup> This may be a reasonable cause of public ignorance regarding HPV.<sup>11</sup>  
 88 Although vaccine production and routine vaccination programs can promote public awareness of  
 89 this virus and its complications, there are no such programs in Iran.<sup>8</sup> Therefore, medical students  
 90 need such information to improve their knowledge and health status and form other social  
 91 campaigns to educate the public. Unfortunately, studies in developed countries have shown that  
 92 most adults and young women, even those with high education, have very little information about  
 93 HPV infection.<sup>8</sup> Thus, it is necessary to evaluate the student's attitudes and knowledge regarding  
 94 HPV to modify and optimize government health education programs.

95 Hence, due to the increasing prevalence of genital warts in recent years and the lack of studies to  
 96 examine medical students' knowledge and attitudes towards genital warts and their prevention

97 methods and routes of transmission, we aimed to conduct this study at Babol University of Medical  
98 Sciences.  
99  
100  
101  
102  
103  
104  
105  
106  
107  
108  
109  
110  
111  
112  
113  
114  
115  
116  
117  
118  
119  
120  
121  
122  
123  
124  
125  
126  
127  
128  
129  
130  
131  
132

## Materials and Methods

This cross-sectional study assessed the perception and attitudes of 385 students at Babol University of Medical Sciences using a pre-established questionnaire. Participants were randomly selected among operating room technicians, nursing, midwifery, lab scientists, and medical students. This study's data collection tool was a questionnaire similar to that used in an earlier study conducted by Ghojazadeh et al., for which validity and reliability were confirmed. Seven academic experts of Tabriz University of Medical Sciences approved the validity of this questionnaire, and its reliability was confirmed via a pilot study in which Cronbach's alpha was 80%.<sup>12</sup> The questionnaire was made up of 3 sections and 62 questions. The first part of this questionnaire included demographic information on participants (8 items). In the second section, they were asked about their knowledge about HPV (10 items), the association of HPV with cervical cancer (2 items), its predisposing factors (10 items), and routes of transmission (22 items). Participants' attitudes towards the person infected with genital warts were then examined in the third section (10 items). The minimum score was 0, and the maximum was 10. To determine the amount of general information in terms of quality and its easier understanding, the interpretation of obtained scores were as follows: Scores of 0-3 were considered inadequate, 4-7 were considered moderate, and 8-10 were considered Favorable. Finally, the data were analyzed using the SPSS v. 22 software (IBM, Chicago, IL, USA). Chi-square tests were used, and a p-value less than 0.05 was considered statistically significant.

## Results

In the current study, 385 students participated with a mean age of  $23.70 \pm 3.27$  years, with a range of 20-50 years. The students' average academic semester was  $8.71 \pm 3.47$ , with a range of 1-14. Evaluation of students' level of general knowledge about HPV showed that 7 (1.8%) students had inadequate general information, while 34 (8.8%) and 344 (89.4%) students had moderate and favorable information in this field, respectively. Evaluation of students' information regarding the predisposing factors of cervical cancer demonstrated that 4 students (1%) had inadequate general information, 176 (45.7%) had moderate information, and 205 (53.2%) had good information. The students' knowledge about HPV transmission routes and contributing factors was as follows: 201 (52.2%) had moderate knowledge, and 184 (47.8%) had good knowledge (Table 1).

According to Table 1, the extent of general information about HPV infection among students is linked to their field of study and education level ( $p < 0.001$  and  $p = 0.003$ , respectively). However, no significant correlation between the students' knowledge and age or sex was observed. Moreover, the extent of students' information regarding the predisposing factors of cervical cancer was significantly correlated with age and field of study ( $p < 0.01$  and  $p < 0.001$ , respectively). Furthermore, regarding the amount of students' knowledge about the HPV transmission routes and contributing factors, they were significantly correlated with students' age and sex ( $p < 0.001$  and  $p < 0.001$ , respectively).

The attitude of the students about communication with HPV-infected individuals was as follows: 90 participants (23.4%) moderate-quality attitude while 295 (76.6%) had a good attitude (Table 2). According to Table 2, the extent students' attitude toward HPV-infected patients was significantly correlated with their age, field of study, and academic degree ( $p < 0.01$ ,  $p < 0.001$ , and  $p = 0.003$ , respectively).

199

## 200 Discussion

201 The study's objective was to investigate Babol University of Medical Sciences students' knowledge  
202 and attitude towards genital warts, their prevention, and transmission pathways. Various analyses of  
203 the participants' knowledge and attitudes toward genital warts showed that almost 90% of the  
204 students had good knowledge about sexually transmitted diseases (STDs). Also, 53% of the  
205 students had good knowledge about the predisposing factors for cervical cancer. The extent of  
206 participant's education and awareness about HPV pathways and their contributing factors was  
207 intermediate among most students. Finally, the vast majority of students had a good attitude about  
208 interacting with people infected with HPV.

209 HPV is one of the most common sexually transmitted infections globally. The primary predisposing  
210 factor of cervical cancer in women aged 15 to 44.<sup>13</sup> The vital issue in the evaluation of students'  
211 knowledge and attitude is the investigation of the student's level of knowledge about HPV  
212 infection, HPV-related risk factors, routes of transmission, and prevention of this infection and  
213 consequently the resultant cervical cancer. Various efforts have been undertaken to improve the  
214 awareness and knowledge of this group of population. Nevertheless, further studies are needed to  
215 raise students' awareness and knowledge and subsequently improve HPV-infected patients'  
216 attitudes and reduce the high-risk population.

217 A recent survey on HPV general information revealed that 10.6% of the students did not have good  
218 general knowledge about HPV. Since the questions applied in this survey were straightforward and  
219 despite this simplicity, some students had little information in this field, preparing educative  
220 programs to increase their level of awareness seems reasonably necessary. In another study by  
221 Grigore et al. in 2018, it was found that 69.2% of the participating women were found to have  
222 information about HPV, but their knowledge in this area was minimal. It has been inferred that the  
223 provision of comprehensive education programs could reduce the prevalence of this infection.<sup>14</sup>  
224 Another study conducted by Pourkazemi et al. in 2017 also recognize low awareness among  
225 students about HPV infection.<sup>15</sup> To evaluate the community's knowledge level about this STD, it  
226 might be reasonable first to examine the medical community and medical students since this  
227 population will be responsible for the community's health education. In the present study, the level  
228 of awareness, knowledge, and attitude has been above the intermediate level, but in Pourkazemi's  
229 study, this level has been much lower than expected, which could be due to differences in the  
230 curricula of the two universities. The exchange of information and teaching courses is done  
231 comprehensively and entirely in some universities of medical sciences, leading to the difference in  
232 knowledge level in different universities' students.<sup>15</sup>

Evaluation of the students' knowledge about HPV, based on age, sex, field of study, and degree of academic education, demonstrated that the students' general information about HPV had no relationship with their age and sex. However, there was a relationship between their knowledge level and field and degree of study. In general, it appears that midwifery and nursing students had less general information than other medical fields. Nevertheless, Salehifar et al. stated students at the School of Nursing and Midwifery had the highest level of knowledge, which was contrary to the results of this study.<sup>16</sup> The reason for this disagreement can be attributed to the difference in the academic year and semester of students involved in these studies since with the progression of the academic year, students will learn more about this topic.

Furthermore, undergraduate students had a lower level of knowledge than Ph.D. students and residents of medical specialties. In our study, 46.7% of the students had inadequate information about the contributing factors of cervical cancer, indicating the necessity of organizing a comprehensive program to improve the students' awareness of cervical cancer risk factors. In 2014, Kwang et al. found that the students' pre-university knowledge of HPV and cancer-predisposing factors was low. They also noted that interest in vaccination could increase the students' level of awareness and knowledge.<sup>17</sup> Besides, the relationship between the field of study and the level of knowledge about cervical cancer's precipitating factors has been significant. It has been shown that surgical technology students had the most favorable and midwifery students had the lowest level of knowledge. Furthermore, medical and laboratory science students were on the same level, and nursing students in the following ranks.

Evaluation of the relationship between Babol University of Medical Sciences students' awareness about HPV transmission routes and its contributing factors with essential variables in this study showed that 61.5% of students over 25 years old had good knowledge in this field. In comparison, 57.6% of students under 25 years of age had moderate knowledge, suggesting that aging raises awareness of HPV transmission routes and their contributing factors. Similarly, a 2013 study by Ortashi et al. stated that students are more likely to become aware of the human papillomavirus, its transmission routes, and its predisposing risk for cervical cancer as they age.<sup>18</sup> Female students also had a higher level of awareness compared to men. The reason may be because women are precisely the population at risk for cervical cancer by HPV. Therefore, knowledge of transmission pathways and risk factors seems more vital to women than to men.

In the present study, over 70% of students had a good attitude towards interacting with people infected with HPV. Furthermore, older students have a better attitude toward this topic. Also, surgical technology, laboratory science, and medical students had the most optimistic interactions with patients. According to the results, midwifery students did not have a good attitude towards people infected with HPV, which was expectable due to the constant interaction of midwives with



infected women. Nonetheless, considering that midwifery students are the front line in treating gynecological diseases, it seems very important to improve their attitude.

Interestingly, medical residents had the best attitude toward this issue. This finding was in agreement with Ghojazadeh et al., where residents were more experienced in contacting infected patients than other students.

It is recommended that other studies should be conducted to evaluate students' knowledge and attitude towards the HPV vaccine. Also, such studies in the general population would be of interest.

295

296

## 297 **Conclusion**

298 Based on the present study results, the knowledge level of most students of Babol University of  
 299 Medical Sciences about genital warts was good, but their information about the routes of  
 300 transmission was intermediate. Furthermore, it is suggested that educational programs should be  
 301 modified and optimized to improve awareness among teachers, health workers, nurses, and medical  
 302 staff of non-medical universities.

303

304

305

306

307

308

309

310

311

312

313

314

315

316

317

318

319

320

321

322

323

324

325

326

327

328

329

## References

- 1- Walboomers J, Jacobs M, Manos M, Bosch F, Kummer J, Shah K. Human papillomavirus is a necessary cause of invasive cervical cancer worldwide. *J Pathol* 1999;189(1):12-9.
- 2- Pim D, Thomas M, Banks L. The function of the human papillomavirus oncogenes. In: *Viruses, Cell Transformation and Cancer* Grand RJA (ed). Amsterdam: Elsevier 2001:145-92.
- 3- Hildesheim A. Human papillomavirus variants: implications for natural history studies and vaccine development efforts. *J Natl Cancer Inst* 1997;89(11):752-3.
- 4- Muñoz N, Bosch F, De Sanjosé S, Herrero R, Castellsagué X, Shah K. Epidemiologic classification of human papillomavirus types associated with cervical cancer. *N Engl J Med* 2003;248(6):518-27.
- 5- Munoz N, Bosch F. Cervical cancer and human papillomavirus: epidemiological evidence and perspectives for prevention. *Salud publica de Mexico* 1997;39(4):274-82.
- 6- Braaten KP, Laufer MR. Human Papillomavirus (HPV), HPV-Related Disease, and the HPV Vaccine. *Rev obstet gynecol* 2008;1(1):2-10.
- 7- Schiffman M, Wentzensen N. Human papillomavirus infection and the multistage carcinogenesis of cervical cancer. *Cancer epidemiology, biomarkers & prevention : a publication of the American Association for Cancer Research, cosponsored by the Am Soc Prevent Oncol* 2013;22(4):553-60.
- 8- Villar LM, Rabello AD, de Paula VS. Evaluating knowledge about human papillomavirus infection among Brazilian health professionals. *Asian Pacific journal of cancer prevention : APJCP* 2011;12(12):3251-6.
- 9- Zhang Y, Wang Y, Liu L, et al. awareness and knowledge about human papillomavirus vaccination and its acceptance in China: a meta-analysis of 58 observational studies. *BMC public health* 2016;16:216.
- 10- Badial RM, Dias MC, Stuqui B, et al. Detection and genotyping of human papillomavirus (HPV) in HIV-infected women and its relationship with HPV/HIV co-infection. *Medicine* 2018;97(14):e9545.
- 11- Stokley S, Szilagyi PG. Improving Human Papillomavirus Vaccination in the United States: Executive Summary. *Acad pediatri* 2018;18(2S):S1-S2.
- 12- Ghojazadeh M, Azar ZF, Saleh P, Naghavi-Behzad M, Azar NG. Knowledge and attitude of Iranian university students toward human papilloma virus. *Asian Pac J Cancer Prevent* 2012;13(12):6115-9.

- 13- Cai T, Di Vico T, Durante J, Tognarelli A, Bartoletti R. Human Papilloma Virus (HPV) and genitourinary cancers: a narrative review. *Minerva Urol Nefrol* 2018.
- 14- Grigore M, Teleman SI, Pristavu A, Matei M. Awareness and knowledge about HPV and HPV vaccine among Romanian women. *J Cancer Edu* 2018;33(1):154-9.
- 15- ourkazemi A, Ghanbari A, Fakour F, Ghorbani S. Knowledge and Attitudes of Medical Students Toward Human Papilloma Virus in Rasht, 2013. *Journal of Guilan University of Medical Sciences* 2017;25(100):1-10.
- 16- salehifar D, Lotfi R, Akbari Kamrani M. Knowledge about cervical cancer, human papilloma virus and attitude towards acceptance of vaccination among female students *J Iranian Institute for Health Sci Res* 2015;14(2):217-26.
- 17- Kwang NB, Yee CM, Shan LP, Teik CK, Chandraleka KN, Abdul Kadir A. Knowledge, perception and attitude towards human papillomavirus among pre-university students in Malaysia. *Asian Pac J Cancer Prev* 2014;15(21):9117-23.
- 18- Ortashi O, Raheel H, Shalal M, Osman N. Awareness and knowledge about human papillomavirus infection and vaccination among women in UAE. *Asian Pacific J Cancer Prevent* 2013;14(10):6077-80.

395

396

397

398 **Table 1.** Comparison of students' general knowledge, predisposing factors of cervical cancer, and  
399 transmission routes and contributing factors stratified by their demographic characteristics

| Variables                                      | Inadequate<br>n (%) | Moderate<br>n (%) | Favorable<br>n (%) | p-value |
|------------------------------------------------|---------------------|-------------------|--------------------|---------|
| <b>General knowledge</b>                       |                     |                   |                    |         |
| Age (year)                                     |                     |                   |                    | 0.31    |
| < 25                                           | 7 (2.5)             | 24 (8.7)          | 245 (88.8)         |         |
| ≥ 25                                           | 0                   | 10 (9.2)          | 99 (90.8)          |         |
| Sex                                            |                     |                   |                    | 0.72    |
| Male                                           | 3 (2.1)             | 14 (10)           | 123 (87.9)         |         |
| Female                                         | 4 (1.6)             | 20 (8.2)          | 221 (90.2)         |         |
| Field of study                                 |                     |                   |                    | < 0.001 |
| Medicine                                       | 0                   | 14 (6.2)          | 213 (93.8)         |         |
| Nursing                                        | 6 (7)               | 11 (12.8)         | 69 (80.2)          |         |
| Midwifery                                      | 1 (3.6)             | 9 (32.1)          | 18 (64.3)          |         |
| Laboratory Sciences                            | 0                   | 0                 | 20 (100)           |         |
| Surgical technology                            | 0                   | 0                 | 24 (100)           |         |
| Academic degree                                |                     |                   |                    | 0.003   |
| Bachelor of Science                            | 7 (4.4)             | 20 (12.7)         | 131 (82.9)         |         |
| Medical Doctor                                 | 0                   | 13 (6.3)          | 192 (93.7)         |         |
| Doctor of Philosophy                           | 0                   | 1 (4.5)           | 21 (95.5)          |         |
| <b>Predisposing factors of cervical cancer</b> |                     |                   |                    |         |
| Age (year)                                     |                     |                   |                    | < 0.01  |
| < 25                                           | 4 (1.5)             | 137 (49.6)        | 135 (48.9)         |         |
| ≥ 25                                           | 0                   | 39 (35.8)         | 70 (64.2)          |         |
| Sex                                            |                     |                   |                    | 0.30    |
| Male                                           | 3 (2.1)             | 64 (45.8)         | 73 (52.1)          |         |

|                                                     |                      |         |            |            |         |
|-----------------------------------------------------|----------------------|---------|------------|------------|---------|
|                                                     | Female               | 1 (0.4) | 112 (45.7) | 132 (53.9) |         |
| Field of study                                      |                      |         |            |            | < 0.001 |
|                                                     | Medicine             | 1 (0.4) | 101 (44.5) | 125 (55.1) |         |
|                                                     | Nursing              | 3 (3.5) | 46 (53.5)  | 37 (43.0)  |         |
|                                                     | Midwifery            | 0       | 18 (64.3)  | 10 (35.7)  |         |
|                                                     | Laboratory Sciences  | 0       | 9 (45.0)   | 11 (55.0)  |         |
|                                                     | Surgical technology  | 0       | 2 (8.3)    | 22 (91.7)  |         |
| Academic degree                                     |                      |         |            |            | 0.56    |
|                                                     | Bachelor of Science  | 3 (1.9) | 75 (47.5)  | 80 (50.6)  |         |
|                                                     | Medical Doctor       | 1 (0.5) | 93 (45.4)  | 111 (54.1) |         |
|                                                     | Doctor of Philosophy | 0       | 8 (36.4)   | 14 (63.6)  |         |
| <b>Transmission routes and contributing factors</b> |                      |         |            |            |         |
| Age (year)                                          |                      |         |            |            | < 0.001 |
|                                                     | < 25                 | 0       | 159 (57.6) | 117 (42.4) |         |
|                                                     | ≥ 25                 | 0       | 42 (38.5)  | 67 (61.5)  |         |
| Sex                                                 |                      |         |            |            | < 0.001 |
|                                                     | Male                 | 0       | 89 (63.6)  | 51 (36.4)  |         |
|                                                     | Female               | 0       | 112 (45.7) | 133 (54.3) |         |
| Field of study                                      |                      |         |            |            | 0.055   |
|                                                     | Medicine             | 0       | 108 (47.6) | 119 (52.4) |         |
|                                                     | Nursing              | 0       | 49 (57.0)  | 37 (43.0)  |         |
|                                                     | Midwifery            | 0       | 13 (46.4)  | 15 (53.6)  |         |
|                                                     | Laboratory Sciences  | 0       | 15 (75.0)  | 5 (25.0)   |         |
|                                                     | Surgical technology  | 0       | 16 (66.7)  | 8 (33.3)   |         |
| Academic degree                                     |                      |         |            |            | 0.08    |
|                                                     | Bachelor of Science  | 0       | 93 (58.9)  | 65 (41.1)  |         |
|                                                     | Medical Doctor       | 0       | 97 (47.3)  | 108 (52.7) |         |
|                                                     | Doctor of Philosophy | 0       | 11 (50.0)  | 11 (50.0)  |         |

400

401

402

403

**Table 2.** Comparison of students' attitude toward human papillomavirus (HPV)-infected patients stratified by their demographic characteristics

| Variables       |                      | Poor<br>n (%) | Moderate<br>n (%) | Favorable<br>n (%) | p-value |
|-----------------|----------------------|---------------|-------------------|--------------------|---------|
| Age (year)      | < 25                 | 0             | 74 (26.8)         | 202 (73.2)         | < 0.01  |
|                 | ≥ 25                 | 0             | 16 (14.7)         | 93 (85.3)          |         |
| Sex             | Male                 | 0             | 31 (22.1)         | 109 (77.9)         | 0.70    |
|                 | Female               | 0             | 59 (24.1)         | 186 (75.9)         |         |
| Field of study  | Medicine             | 0             | 41 (18.1)         | 186 (81.9)         | < 0.001 |
|                 | Nursing              | 0             | 28 (32.6)         | 58 (67.4)          |         |
|                 | Midwifery            | 0             | 19 (67.9)         | 9 (32.1)           |         |
|                 | Laboratory Sciences  | 0             | 2 (10.0)          | 18 (90.0)          |         |
|                 | Surgical technology  | 0             | 0                 | 24 (100)           |         |
| Academic degree | Bachelor of Science  | 0             | 49 (31.0)         | 109 (69.0)         | 0.003   |
|                 | Medical Doctor       | 0             | 40 (19.5)         | 165 (80.5)         |         |
|                 | Doctor of Philosophy | 0             | 1 (4.5)           | 21 (95.5)          |         |
