1 **Knowledge and attitude of Iranian university students toward genital warts**

2 **Running title:** Knowledge and attitude of students toward HPV

3 Zeinab Aryanian<sup>1,2</sup>, Maedeh Mohammadi<sup>2</sup>, Arefeh Babazadeh<sup>3</sup>, Ifa Etesami<sup>1,4</sup>, Parvaneh Hatami<sup>1,3</sup>,  
4 Mohammad Barary<sup>5</sup>, Soheil Ebrahimpour<sup>3</sup>, Parisa Sabbagh<sup>3</sup>, Azadeh Goodarzi<sup>6,\*</sup>

5 1- Autoimmune Bullous Diseases Research Center, Tehran University of Medical Sciences, Tehran,  
6 Iran

7 2- Department of Dermatology, School of Medicine, Babol University of Medical Sciences, Babol,  
8 Iran

9 3- Infectious Diseases and Tropical Medicine Research Center, Health Research Institute, Babol  
10 University of Medical Sciences, Babol, Iran

11 4- Department of Dermatology, Tehran University of Medical Sciences, Tehran, Iran

12 5- Student Research Committee, Babol University of Medical Sciences, Babol, Iran

13 6- Department of Dermatology, School of Medicine, Iran University of Medical Sciences, Tehran,  
14 Iran

15 **Correspondence:** Azadeh Goodarzi, Rasoul Akram Hospital, Iran University of Medical Sciences  
16 (IUMS), Niayesh Blvd., Sattarkhan St., Tehran, Iran. Email: [goodarzi.a@iums.ac.ir](mailto:goodarzi.a@iums.ac.ir);  
17 [drssoheil.d@gmail.com](mailto:drssoheil.d@gmail.com). Tel: +98912-388-2448

18

19 **Funding statement**

20 This study was fully supported by the vice-chancellor for research and technology of Babol  
21 University of Medical Sciences.

22 **Acknowledgments**

23 The authors thank the Department of Infectious Diseases of Babol University of Medical Sciences.

24 **Data Availability Statement**

25 The data that support the findings of this study are available from the corresponding author upon  
26 reasonable request.

27 **Conflict of interest disclosure**

28 All authors declare no conflict of interest.

29 **Ethics approval statement**

30 This study protocol was approved by the ethics committee of Babol University of Medical Sciences  
31 (MUBABOL.HRI.REC.1396.19).

32

33 **Abstract**

34 Human papillomavirus (HPV) is one of the well-known causes of cervical cancer and one of the  
35 most prevalent sexually transmitted diseases (STDs). Since cervical cancer is one of the most  
36 common causes of morbidity and mortality in women, this study was performed to investigate  
37 students' knowledge and attitudes in Babol University of Medical Sciences, Northern Iran, towards  
38 genital warts. This cross-sectional study assessed the perception and attitudes of 385 students at  
39 Babol University of Medical Sciences using a preconceived questionnaire. The data collection tool  
40 used in this study was a questionnaire that was confirmed to be valid and reliable. The participants'  
41 mean age was  $23.70 \pm 3.27$  years, with a range of 20-50 years. Evaluation of these students' level of  
42 general information about HPV showed that 7 (1.8%) students had inadequate general information,  
43 34 (8.8%) had moderate knowledge, and 344 (89.4%) had good general knowledge in this setting.  
44 There was also a significant association between students' general knowledge of HPV and their  
45 field of study. Based on the present study results, the knowledge of the majority of Babol  
46 University of Medical Sciences students about genital warts was in a good range, and their  
47 knowledge about HPV routes of transmission was of moderate level. Moreover, the majority had an  
48 appropriate attitude to interact with people infected with HPV.

49

50 **Keywords:** Human papillomavirus; Cervical cancer; Knowledge; Attitude; Students

51

52

53

54

55

56

57

58

59

60

61

62

## 63 **Introduction**

64 Human papillomavirus (HPV) is the standard warts agent, manifested by multiple skin-colored  
65 papules in different parts of the body, including the anus, vulva, penis, and pubis. It may occur in all  
66 human populations and can sometimes lead to cancer. Its infectivity mechanism involves the  
67 cutaneous and mucosal epithelial tissues from different anatomical regions.<sup>1</sup> To date, more than a  
68 hundred different types of HPV have been identified, one-third of which infect the epithelial cells of  
69 the reproductive system.<sup>2</sup> Human genital papillomavirus types are divided into two categories: low-  
70 risk types, such as HPV types 6, and 11, which are the causes of benign warts, do not progress to  
71 cancer, and usually improve spontaneously. On the other hand, high-risk types, including HPV  
72 types 16, 18, 31, 33, and 45, associated with the development of genital cancer, have been engaged  
73 in 99% of cervical cancers, among which HPV 16 is the most common type involved.<sup>3-5</sup>

74 The increasing prevalence of HPV as the most common sexually transmitted disease (STD) in  
75 young people has caused considerable interest in human health.<sup>6</sup> HPV can be transmitted through  
76 sexual intercourse. Studies have shown that 30-60% of sexually active adults become infected with  
77 HPV at least once during their reproductive age, and this rate is higher in younger women than the  
78 older ones.<sup>7-9</sup> Nearly 80% of HPV infections disappear within 3 to 4 years without intervention.  
79 However, primary prevention using vaccination and screening for cervical cancer appears to be  
80 beneficial.<sup>8</sup> The HPV vaccine is safe and reduces cervical cancer progression in 70% of cases, and  
81 to have the utmost efficacy, it should be given before first sexual intercourse.

82 Nevertheless, recommending the vaccine to a single adult girl has posed challenges.<sup>8,9</sup> On the other  
83 hand, the anxiety of being infected and being diagnosed with HPV infection through Papanicolaou  
84 (Pap) smear screening test seems to be due to a lack of knowledge about HPV infection.<sup>10</sup>  
85 Therefore, being aware of the relationship between HPV and cervical cancer is the most critical  
86 issue for the general population. Surprisingly, even health care personnel appear to have little  
87 information about this entity.<sup>8</sup> This may be a reasonable cause of public ignorance regarding HPV.<sup>11</sup>  
88 Although vaccine production and routine vaccination programs can promote public awareness of  
89 this virus and its complications, there are no such programs in Iran.<sup>8</sup> Therefore, medical students  
90 need such information to improve their knowledge and health status and form other social  
91 campaigns to educate the public. Unfortunately, studies in developed countries have shown that  
92 most adults and young women, even those with high education, have very little information about  
93 HPV infection.<sup>8</sup> Thus, it is necessary to evaluate the student's attitudes and knowledge regarding  
94 HPV to modify and optimize government health education programs.

95 Hence, due to the increasing prevalence of genital warts in recent years and the lack of studies to  
96 examine medical students' knowledge and attitudes towards genital warts and their prevention

97 methods and routes of transmission, we aimed to conduct this study at Babol University of Medical  
98 Sciences.  
99  
100  
101  
102  
103  
104  
105  
106  
107  
108  
109  
110  
111  
112  
113  
114  
115  
116  
117  
118  
119  
120  
121  
122  
123  
124  
125  
126  
127  
128  
129  
130  
131  
132

133 **Materials and Methods**

134 This cross-sectional study assessed the perception and attitudes of 385 students at Babol University  
135 of Medical Sciences using a pre-established questionnaire. Participants were randomly selected  
136 among operating room technicians, nursing, midwifery, lab scientists, and medical students. This  
137 study's data collection tool was a questionnaire similar to that used in an earlier study conducted by  
138 Ghojzadeh et al., for which validity and reliability were confirmed. Seven academic experts of  
139 Tabriz University of Medical Sciences approved the validity of this questionnaire, and its reliability  
140 was confirmed via a pilot study in which Cronbach's alpha was 80%.<sup>12</sup> The questionnaire was made  
141 up of 3 sections and 62 questions. The first part of this questionnaire included demographic  
142 information on participants (8 items). In the second section, they were asked about their knowledge  
143 about HPV (10 items), the association of HPV with cervical cancer (2 items), its predisposing  
144 factors (10 items), and routes of transmission (22 items). Participants' attitudes towards the person  
145 infected with genital warts were then examined in the third section (10 items).

146 The minimum score was 0, and the maximum was 10. To determine the amount of general  
147 information in terms of quality and its easier understanding, the interpretation of obtained scores  
148 were as follows: Scores of 0-3 were considered inadequate, 4-7 were considered moderate, and 8-10  
149 were considered Favorable.

150 Finally, the data were analyzed using the SPSS v. 22 software (IBM, Chicago, IL, USA). Chi-  
151 square tests were used, and a p-value less than 0.05 was considered statistically significant.

152

153

154

155

156

157

158

159

160

161

162

163

164 **Results**

165 In the current study, 385 students participated with a mean age of  $23.70 \pm 3.27$  years, with a range  
166 of 20-50 years. The students' average academic semester was  $8.71 \pm 3.47$ , with a range of 1-14.  
167 Evaluation of students' level of general knowledge about HPV showed that 7 (1.8%) students had  
168 inadequate general information, while 34 (8.8%) and 344 (89.4%) students had moderate and  
169 favorable information in this field, respectively. Evaluation of students' information regarding the  
170 predisposing factors of cervical cancer demonstrated that 4 students (1%) had inadequate general  
171 information, 176 (45.7%) had moderate information, and 205 (53.2%) had good information. The  
172 students' knowledge about HPV transmission routes and contributing factors was as follows: 201  
173 (52.2%) had moderate knowledge, and 184 (47.8%) had good knowledge (Table 1).

174 According to Table 1, the extent of general information about HPV infection among students is  
175 linked to their field of study and education level ( $p < 0.001$  and  $p = 0.003$ , respectively). However,  
176 no significant correlation between the students' knowledge and age or sex was observed. Moreover,  
177 the extent of students' information regarding the predisposing factors of cervical cancer was  
178 significantly correlated with age and field of study ( $p < 0.01$  and  $p < 0.001$ , respectively).  
179 Furthermore, regarding the amount of students' knowledge about the HPV transmission routes and  
180 contributing factors, they were significantly correlated with students' age and sex ( $p < 0.001$  and  $p$   
181  $< 0.001$ , respectively).

182 The attitude of the students about communication with HPV-infected individuals was as follows: 90  
183 participants (23.4%) moderate-quality attitude while 295 (76.6%) had a good attitude (Table 2).  
184 According to Table 2, the extent students' attitude toward HPV-infected patients was significantly  
185 correlated with their age, field of study, and academic degree ( $p < 0.01$ ,  $p < 0.001$ , and  $p = 0.003$ ,  
186 respectively).

187  
188  
189  
190  
191  
192  
193  
194  
195  
196  
197  
198

199

## 200 **Discussion**

201 The study's objective was to investigate Babol University of Medical Sciences students' knowledge  
202 and attitude towards genital warts, their prevention, and transmission pathways. Various analyses of  
203 the participants' knowledge and attitudes toward genital warts showed that almost 90% of the  
204 students had good knowledge about sexually transmitted diseases (STDs). Also, 53% of the  
205 students had good knowledge about the predisposing factors for cervical cancer. The extent of  
206 participant's education and awareness about HPV pathways and their contributing factors was  
207 intermediate among most students. Finally, the vast majority of students had a good attitude about  
208 interacting with people infected with HPV.

209 HPV is one of the most common sexually transmitted infections globally. The primary predisposing  
210 factor of cervical cancer in women aged 15 to 44.<sup>13</sup> The vital issue in the evaluation of students'  
211 knowledge and attitude is the investigation of the student's level of knowledge about HPV  
212 infection, HPV-related risk factors, routes of transmission, and prevention of this infection and  
213 consequently the resultant cervical cancer. Various efforts have been undertaken to improve the  
214 awareness and knowledge of this group of population. Nevertheless, further studies are needed to  
215 raise students' awareness and knowledge and subsequently improve HPV-infected patients'  
216 attitudes and reduce the high-risk population.

217 A recent survey on HPV general information revealed that 10.6% of the students did not have good  
218 general knowledge about HPV. Since the questions applied in this survey were straightforward and  
219 despite this simplicity, some students had little information in this field, preparing educative  
220 programs to increase their level of awareness seems reasonably necessary. In another study by  
221 Grigore et al. in 2018, it was found that 69.2% of the participating women were found to have  
222 information about HPV, but their knowledge in this area was minimal. It has been inferred that the  
223 provision of comprehensive education programs could reduce the prevalence of this infection.<sup>14</sup>  
224 Another study conducted by Pourkazemi et al. in 2017 also recognize low awareness among  
225 students about HPV infection.<sup>15</sup> To evaluate the community's knowledge level about this STD, it  
226 might be reasonable first to examine the medical community and medical students since this  
227 population will be responsible for the community's health education. In the present study, the level  
228 of awareness, knowledge, and attitude has been above the intermediate level, but in Pourkazemi's  
229 study, this level has been much lower than expected, which could be due to differences in the  
230 curricula of the two universities. The exchange of information and teaching courses is done  
231 comprehensively and entirely in some universities of medical sciences, leading to the difference in  
232 knowledge level in different universities' students.<sup>15</sup>

233 Evaluation of the students' knowledge about HPV, based on age, sex, field of study, and degree of  
234 academic education, demonstrated that the students' general information about HPV had no  
235 relationship with their age and sex. However, there was a relationship between their knowledge  
236 level and field and degree of study. In general, it appears that midwifery and nursing students had  
237 less general information than other medical fields. Nevertheless, Salehifar et al. stated students at  
238 the School of Nursing and Midwifery had the highest level of knowledge, which was contrary to the  
239 results of this study.<sup>16</sup> The reason for this disagreement can be attributed to the difference in the  
240 academic year and semester of students involved in these studies since with the progression of the  
241 academic year, students will learn more about this topic.

242 Furthermore, undergraduate students had a lower level of knowledge than Ph.D. students and  
243 residents of medical specialties. In our study, 46.7% of the students had inadequate information  
244 about the contributing factors of cervical cancer, indicating the necessity of organizing a  
245 comprehensive program to improve the students' awareness of cervical cancer risk factors. In 2014,  
246 Kwang et al. found that the students' pre-university knowledge of HPV and cancer-predisposing  
247 factors was low. They also noted that interest in vaccination could increase the students' level of  
248 awareness and knowledge.<sup>17</sup> Besides, the relationship between the field of study and the level of  
249 knowledge about cervical cancer's precipitating factors has been significant. It has been shown that  
250 surgical technology students had the most favorable and midwifery students had the lowest level of  
251 knowledge. Furthermore, medical and laboratory science students were on the same level, and  
252 nursing students in the following ranks.

253 Evaluation of the relationship between Babol University of Medical Sciences students' awareness  
254 about HPV transmission routes and its contributing factors with essential variables in this study  
255 showed that 61.5% of students over 25 years old had good knowledge in this field. In comparison,  
256 57.6% of students under 25 years of age had moderate knowledge, suggesting that aging raises  
257 awareness of HPV transmission routes and their contributing factors. Similarly, a 2013 study by  
258 Ortashi et al. stated that students are more likely to become aware of the human papillomavirus, its  
259 transmission routes, and its predisposing risk for cervical cancer as they age.<sup>18</sup> Female students also  
260 had a higher level of awareness compared to men. The reason may be because women are precisely  
261 the population at risk for cervical cancer by HPV. Therefore, knowledge of transmission pathways  
262 and risk factors seems more vital to women than to men.

263 In the present study, over 70% of students had a good attitude towards interacting with people  
264 infected with HPV. Furthermore, older students have a better attitude toward this topic. Also,  
265 surgical technology, laboratory science, and medical students had the most optimistic interactions  
266 with patients. According to the results, midwifery students did not have a good attitude towards  
267 people infected with HPV, which was expectable due to the constant interaction of midwives with



268 infected women. Nonetheless, considering that midwifery students are the front line in treating  
269 gynecological diseases, it seems very important to improve their attitude.

270 Interestingly, medical residents had the best attitude toward this issue. This finding was in  
271 agreement with Ghojazadeh et al., where residents were more experienced in contacting infected  
272 patients than other students.

273 It is recommended that other studies should be conducted to evaluate students' knowledge and  
274 attitude towards the HPV vaccine. Also, such studies in the general population would be of interest.

275

276

277

278

279

280

281

282

283

284

285

286

287

288

289

290

291

292

293

294

295

296

297 **Conclusion**

298 Based on the present study results, the knowledge level of most students of Babol University of  
299 Medical Sciences about genital warts was good, but their information about the routes of  
300 transmission was intermediate. Furthermore, it is suggested that educational programs should be  
301 modified and optimized to improve awareness among teachers, health workers, nurses, and medical  
302 staff of non-medical universities.

303

304

305

306

307

308

309

310

311

312

313

314

315

316

317

318

319

320

321

322

323

324

325

326

327

328

329

330

331

332

### 333 **References**

- 334 1- Walboomers J, Jacobs M, Manos M, Bosch F, Kummer J, Shah K. Human papillomavirus is a  
335 necessary cause of invasive cervical cancer worldwide. *J Pathol* 1999;189(1):12-9.
- 336 2- Pim D, Thomas M, Banks L. The function of the human papillomavirus oncogenes. In:  
337 *Viruses, Cell Transformation and Cancer* Grand RJA (ed). Amsterdam: Elsevier 2001:145-92.
- 338 3- Hildesheim A. Human papillomavirus variants: implications for natural history studies and  
339 vaccine development efforts. *J Natl Cancer Inst* 1997;89(11):752-3.
- 340 4- Muñoz N, Bosch F, De Sanjosé S, Herrero R, Castellsagué X, Shah K. Epidemiologic  
341 classification of human papillomavirus types associated with cervical cancer. *N Engl J Med*  
342 2003;248(6):518-27.
- 343 5- Munoz N, Bosch F. Cervical cancer and human papillomavirus: epidemiological evidence and  
344 perspectives for prevention. *Salud publica de Mexico* 1997;39(4):274-82.
- 345 6- Braaten KP, Laufer MR. Human Papillomavirus (HPV), HPV-Related Disease, and the HPV  
346 Vaccine. *Rev obstet gynecol* 2008;1(1):2-10.
- 347 7- Schiffman M, Wentzensen N. Human papillomavirus infection and the multistage  
348 carcinogenesis of cervical cancer. *Cancer epidemiology, biomarkers & prevention : a*  
349 *publication of the American Association for Cancer Research, cosponsored by the Am Soc*  
350 *Prevent Oncol* 2013;22(4):553-60.
- 351 8- Villar LM, Rabello AD, de Paula VS. Evaluating knowledge about human papillomavirus  
352 infection among Brazilian health professionals. *Asian Pacific journal of cancer prevention :*  
353 *APJCP* 2011;12(12):3251-6.
- 354 9- Zhang Y, Wang Y, Liu L, et al. awareness and knowledge about human papillomavirus  
355 vaccination and its acceptance in China: a meta-analysis of 58 observational studies. *BMC*  
356 *public health* 2016;16:216.
- 357 10- Badial RM, Dias MC, Stuqui B, et al. Detection and genotyping of human papillomavirus  
358 (HPV) in HIV-infected women and its relationship with HPV/HIV co-infection. *Medicine*  
359 2018;97(14):e9545.
- 360 11- Stokley S, Szilagyi PG. Improving Human Papillomavirus Vaccination in the United States:  
361 Executive Summary. *Acad pediatri* 2018;18(2S):S1-S2.
- 362 12- Ghojzadeh M, Azar ZF, Saleh P, Naghavi-Behzad M, Azar NG. Knowledge and attitude of  
363 Iranian university students toward human papilloma virus. *Asian Pac J Cancer Prevent*  
364 2012;13(12):6115-9.

- 365 13- Cai T, Di Vico T, Durante J, Tognarelli A, Bartoletti R. Human Papilloma Virus (HPV) and  
366 genitourinary cancers: a narrative review. *Minerva Urol Nefrol* 2018.
- 367 14- Grigore M, Teleman SI, Pristavu A, Matei M. Awareness and knowledge about HPV and HPV  
368 vaccine among Romanian women. *J Cancer Edu* 2018;33(1):154-9.
- 369 15- ourkazemi A, Ghanbari A, Fakour F, Ghorbani S. Knowledge and Attitudes of Medical  
370 Students Toward Human Papilloma Virus in Rasht, 2013. *Journal of Guilan University of*  
371 *Medical Sciences* 2017;25(100):1-10.
- 372 16- salehifar D, Lotfi R, Akbari Kamrani M. Knowledge about cervical cancer, human papilloma  
373 virus and attitude towards acceptance of vaccination among female students *J Iranian Institute*  
374 *for Health Sci Res* 2015;14(2):217-26.
- 375 17- Kwang NB, Yee CM, Shan LP, Teik CK, Chandraleaga KN, Abdul Kadir A. Knowledge,  
376 perception and attitude towards human papillomavirus among pre-university students in  
377 Malaysia. *Asian Pac J Cancer Prev* 2014;15(21):9117-23.
- 378 18- Ortashi O, Raheel H, Shalal M, Osman N. Awareness and knowledge about human  
379 papillomavirus infection and vaccination among women in UAE. *Asian Pacific J Cancer*  
380 *Prevent* 2013;14(10):6077-80.

381

382

383

384

385

386

387

388

389

390

391

392

393

394

395

396

397

398 **Table 1.** Comparison of students' general knowledge, predisposing factors of cervical cancer, and  
 399 transmission routes and contributing factors stratified by their demographic characteristics

| Variables                                      | Inadequate<br>n (%) | Moderate<br>n (%) | Favorable<br>n (%) | p-value |
|------------------------------------------------|---------------------|-------------------|--------------------|---------|
| <b>General knowledge</b>                       |                     |                   |                    |         |
| Age (year)                                     |                     |                   |                    | 0.31    |
| < 25                                           | 7 (2.5)             | 24 (8.7)          | 245 (88.8)         |         |
| ≥ 25                                           | 0                   | 10 (9.2)          | 99 (90.8)          |         |
| Sex                                            |                     |                   |                    | 0.72    |
| Male                                           | 3 (2.1)             | 14 (10)           | 123 (87.9)         |         |
| Female                                         | 4 (1.6)             | 20 (8.2)          | 221 (90.2)         |         |
| Field of study                                 |                     |                   |                    | < 0.001 |
| Medicine                                       | 0                   | 14 (6.2)          | 213 (93.8)         |         |
| Nursing                                        | 6 (7)               | 11 (12.8)         | 69 (80.2)          |         |
| Midwifery                                      | 1 (3.6)             | 9 (32.1)          | 18 (64.3)          |         |
| Laboratory Sciences                            | 0                   | 0                 | 20 (100)           |         |
| Surgical technology                            | 0                   | 0                 | 24 (100)           |         |
| Academic degree                                |                     |                   |                    | 0.003   |
| Bachelor of Science                            | 7 (4.4)             | 20 (12.7)         | 131 (82.9)         |         |
| Medical Doctor                                 | 0                   | 13 (6.3)          | 192 (93.7)         |         |
| Doctor of Philosophy                           | 0                   | 1 (4.5)           | 21 (95.5)          |         |
| <b>Predisposing factors of cervical cancer</b> |                     |                   |                    |         |
| Age (year)                                     |                     |                   |                    | < 0.01  |
| < 25                                           | 4 (1.5)             | 137 (49.6)        | 135 (48.9)         |         |
| ≥ 25                                           | 0                   | 39 (35.8)         | 70 (64.2)          |         |
| Sex                                            |                     |                   |                    | 0.30    |
| Male                                           | 3 (2.1)             | 64 (45.8)         | 73 (52.1)          |         |

|                                                     |                      |         |            |            |         |
|-----------------------------------------------------|----------------------|---------|------------|------------|---------|
|                                                     | Female               | 1 (0.4) | 112 (45.7) | 132 (53.9) |         |
| <hr/>                                               |                      |         |            |            |         |
| Field of study                                      |                      |         |            |            | < 0.001 |
|                                                     | Medicine             | 1 (0.4) | 101 (44.5) | 125 (55.1) |         |
|                                                     | Nursing              | 3 (3.5) | 46 (53.5)  | 37 (43.0)  |         |
|                                                     | Midwifery            | 0       | 18 (64.3)  | 10 (35.7)  |         |
|                                                     | Laboratory Sciences  | 0       | 9 (45.0)   | 11 (55.0)  |         |
|                                                     | Surgical technology  | 0       | 2 (8.3)    | 22 (91.7)  |         |
| <hr/>                                               |                      |         |            |            |         |
| Academic degree                                     |                      |         |            |            | 0.56    |
|                                                     | Bachelor of Science  | 3 (1.9) | 75 (47.5)  | 80 (50.6)  |         |
|                                                     | Medical Doctor       | 1 (0.5) | 93 (45.4)  | 111 (54.1) |         |
|                                                     | Doctor of Philosophy | 0       | 8 (36.4)   | 14 (63.6)  |         |
| <hr/>                                               |                      |         |            |            |         |
| <b>Transmission routes and contributing factors</b> |                      |         |            |            |         |
| <hr/>                                               |                      |         |            |            |         |
| Age (year)                                          |                      |         |            |            | < 0.001 |
|                                                     | < 25                 | 0       | 159 (57.6) | 117 (42.4) |         |
|                                                     | ≥ 25                 | 0       | 42 (38.5)  | 67 (61.5)  |         |
| <hr/>                                               |                      |         |            |            |         |
| Sex                                                 |                      |         |            |            | < 0.001 |
|                                                     | Male                 | 0       | 89 (63.6)  | 51 (36.4)  |         |
|                                                     | Female               | 0       | 112 (45.7) | 133 (54.3) |         |
| <hr/>                                               |                      |         |            |            |         |
| Field of study                                      |                      |         |            |            | 0.055   |
|                                                     | Medicine             | 0       | 108 (47.6) | 119 (52.4) |         |
|                                                     | Nursing              | 0       | 49 (57.0)  | 37 (43.0)  |         |
|                                                     | Midwifery            | 0       | 13 (46.4)  | 15 (53.6)  |         |
|                                                     | Laboratory Sciences  | 0       | 15 (75.0)  | 5 (25.0)   |         |
|                                                     | Surgical technology  | 0       | 16 (66.7)  | 8 (33.3)   |         |
| <hr/>                                               |                      |         |            |            |         |
| Academic degree                                     |                      |         |            |            | 0.08    |
|                                                     | Bachelor of Science  | 0       | 93 (58.9)  | 65 (41.1)  |         |
|                                                     | Medical Doctor       | 0       | 97 (47.3)  | 108 (52.7) |         |
|                                                     | Doctor of Philosophy | 0       | 11 (50.0)  | 11 (50.0)  |         |

400

401

402

403

404

405

406

407 **Table 2.** Comparison of students' attitude toward human papillomavirus (HPV)-infected patients  
 408 stratified by their demographic characteristics

| <b>Variables</b>       |                             | <b>Poor<br/>n (%)</b> | <b>Moderate<br/>n (%)</b> | <b>Favorable<br/>n (%)</b> | <b>p-value</b> |
|------------------------|-----------------------------|-----------------------|---------------------------|----------------------------|----------------|
| <b>Age (year)</b>      | <b>&lt; 25</b>              | 0                     | 74 (26.8)                 | 202 (73.2)                 | < 0.01         |
|                        | <b>≥ 25</b>                 | 0                     | 16 (14.7)                 | 93 (85.3)                  |                |
| <b>Sex</b>             | <b>Male</b>                 | 0                     | 31 (22.1)                 | 109 (77.9)                 | 0.70           |
|                        | <b>Female</b>               | 0                     | 59 (24.1)                 | 186 (75.9)                 |                |
| <b>Field of study</b>  | <b>Medicine</b>             | 0                     | 41 (18.1)                 | 186 (81.9)                 | < 0.001        |
|                        | <b>Nursing</b>              | 0                     | 28 (32.6)                 | 58 (67.4)                  |                |
|                        | <b>Midwifery</b>            | 0                     | 19 (67.9)                 | 9 (32.1)                   |                |
|                        | <b>Laboratory Sciences</b>  | 0                     | 2 (10.0)                  | 18 (90.0)                  |                |
|                        | <b>Surgical technology</b>  | 0                     | 0                         | 24 (100)                   |                |
| <b>Academic degree</b> | <b>Bachelor of Science</b>  | 0                     | 49 (31.0)                 | 109 (69.0)                 | 0.003          |
|                        | <b>Medical Doctor</b>       | 0                     | 40 (19.5)                 | 165 (80.5)                 |                |
|                        | <b>Doctor of Philosophy</b> | 0                     | 1 (4.5)                   | 21 (95.5)                  |                |

409

410
